# Supplementary material for: Regulation of blood–brain barrier integrity by microbiome-associated methylamines and cognition by trimethylamine N-oxide
Source: PubMed Central journal article supplement (PMC8626999; doi:10.1186/s40168-021-01181-z), 2021-11-27

Supplementary Figure 1

A

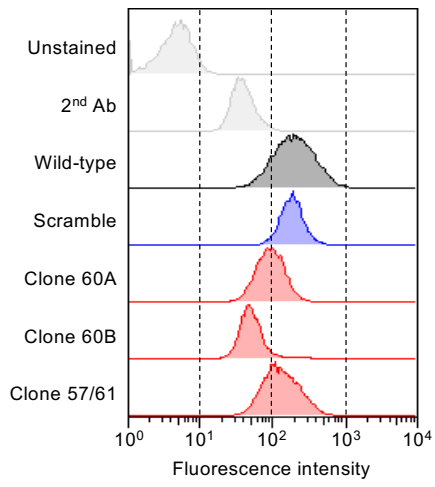

B

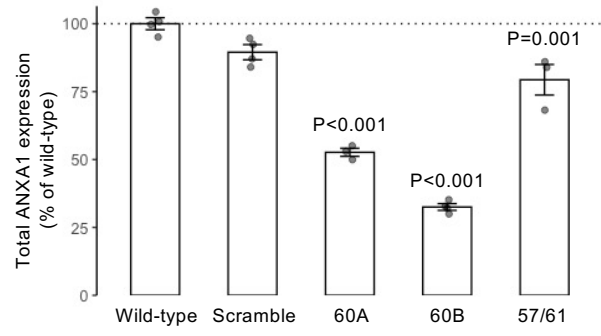

Supplementary Figure 2

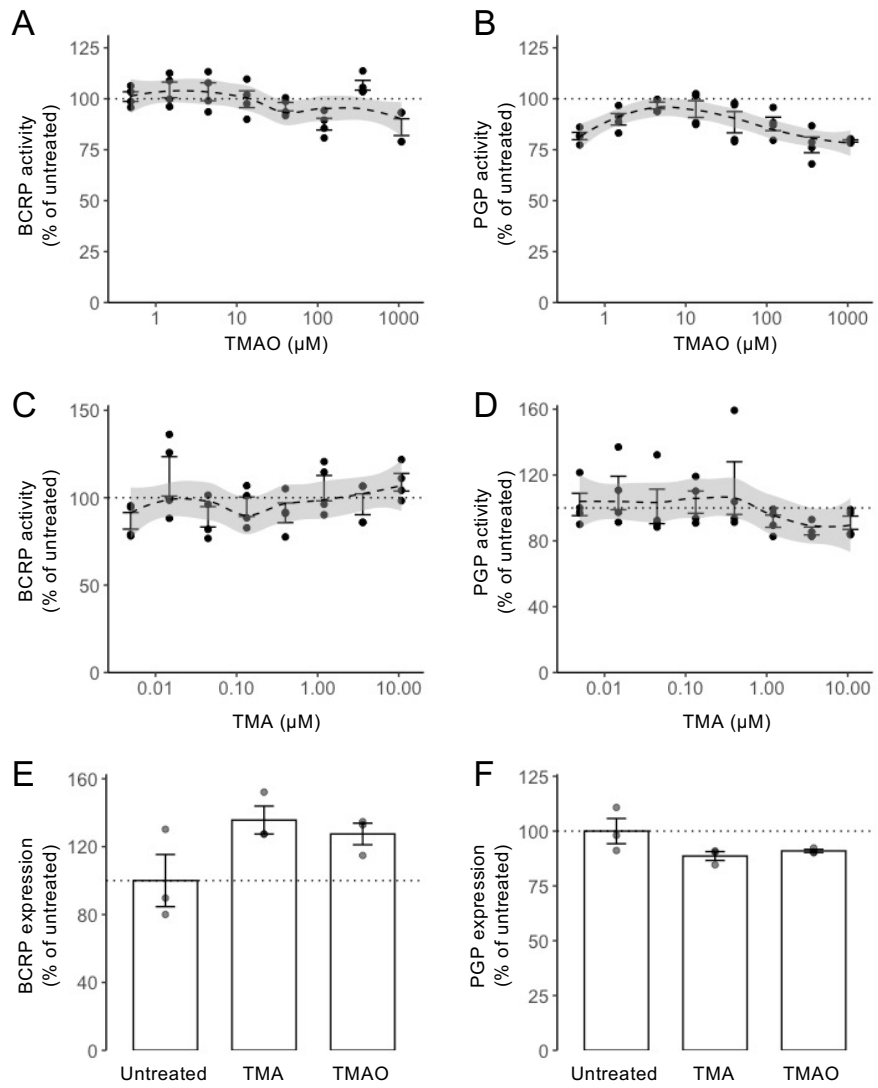

Supplementary Figure 3

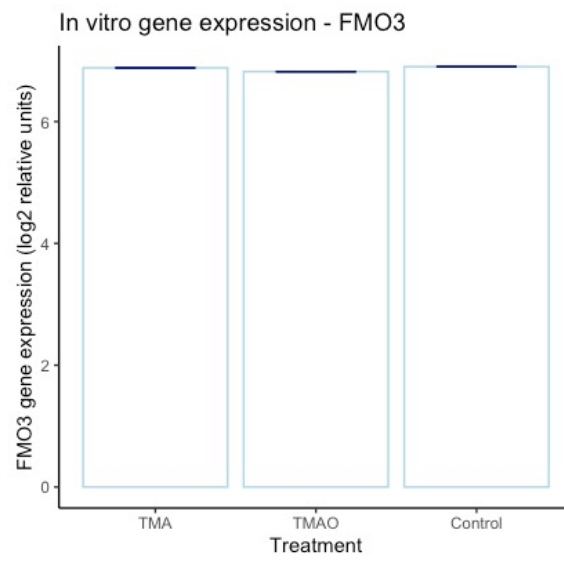

Supplementary Figure 4

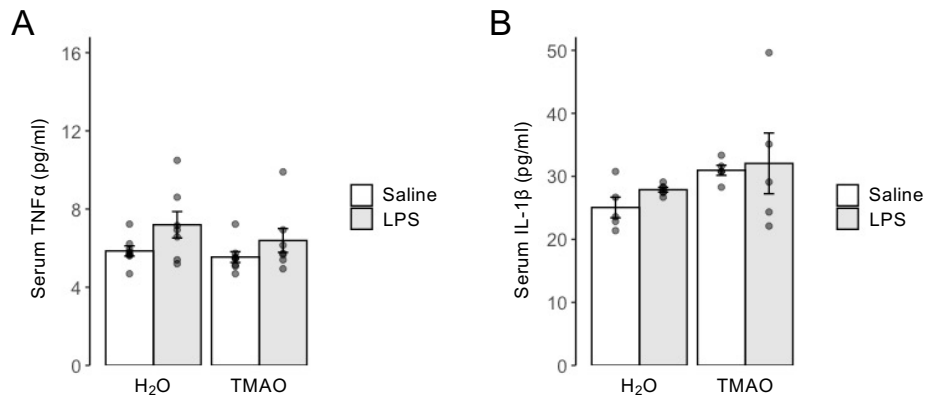

Supplement: 40168_2021_1181_MOESM2_ESM.pdf [file 40168_2021_1181_MOESM2_ESM.pdf]
